# Supplementary material
Source: Hindawi journal article supplement (doi:10.1155/2011/251517)
Supplement: f1 [file 251517.f1.pdf]

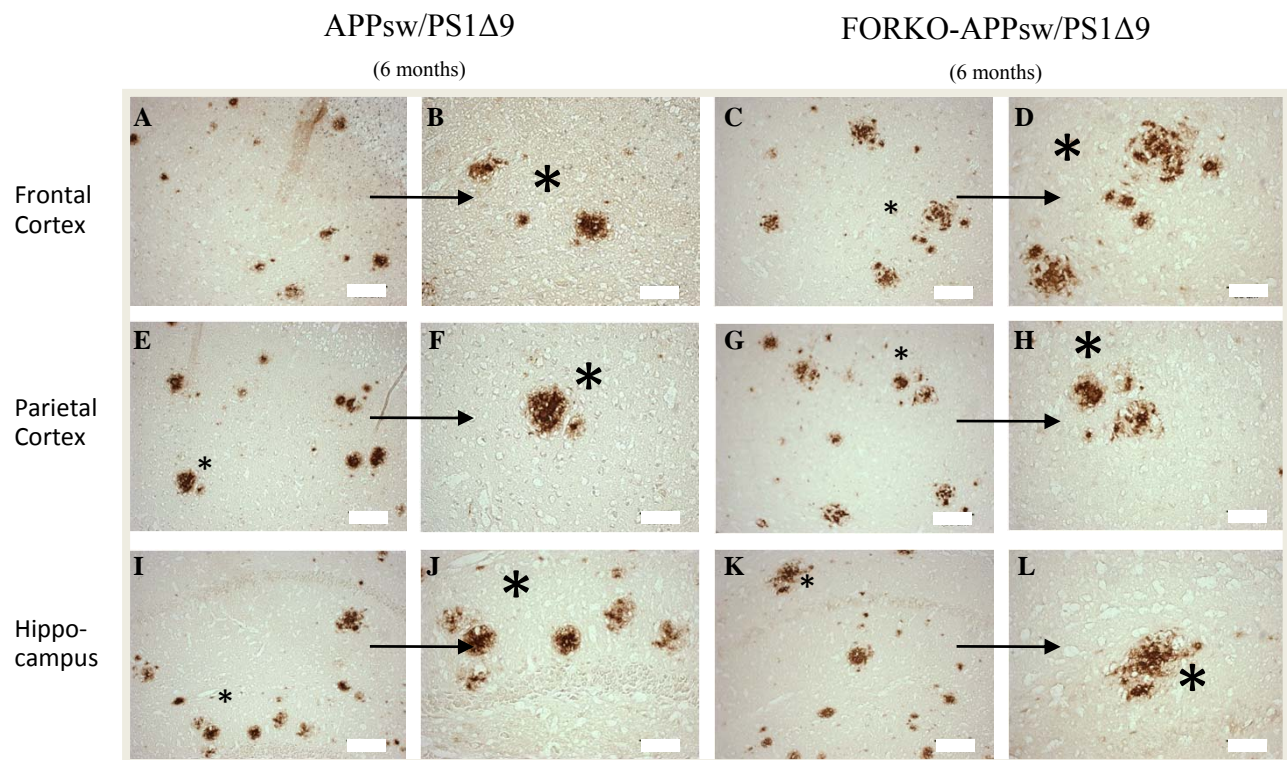

**Supplemental Figure 1**

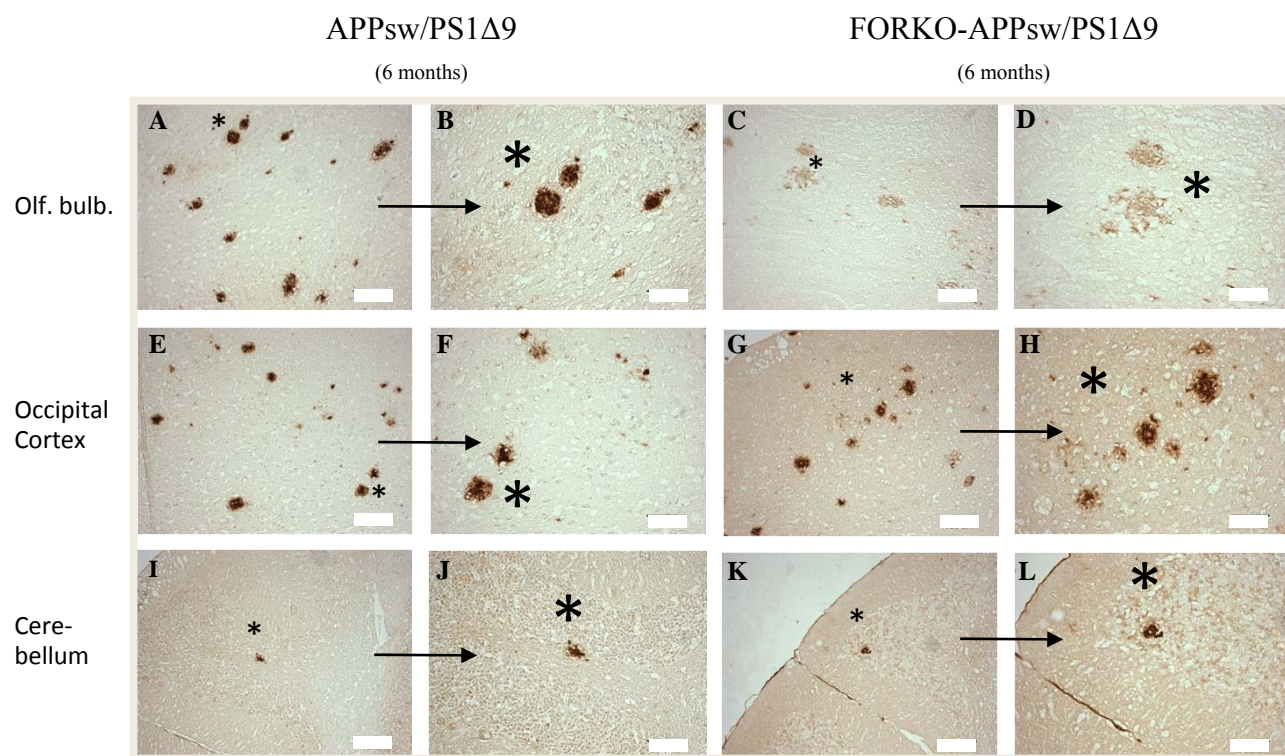

**Supplemental Figure 2**

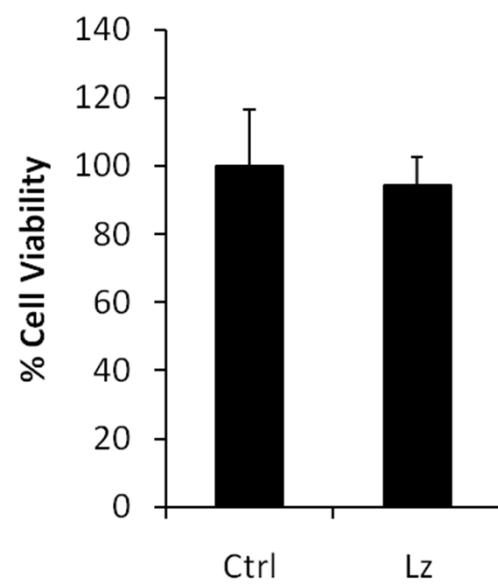

**Supplemental Figure 3**
